# Supplementary material
Source: PubMed Central journal article supplement (PMC3795609)

## Figure e-1

**Figure e-1a** Meta-analysis and Forest plot of comparison – Patients with MA vs. controls: white matter abnormalities.

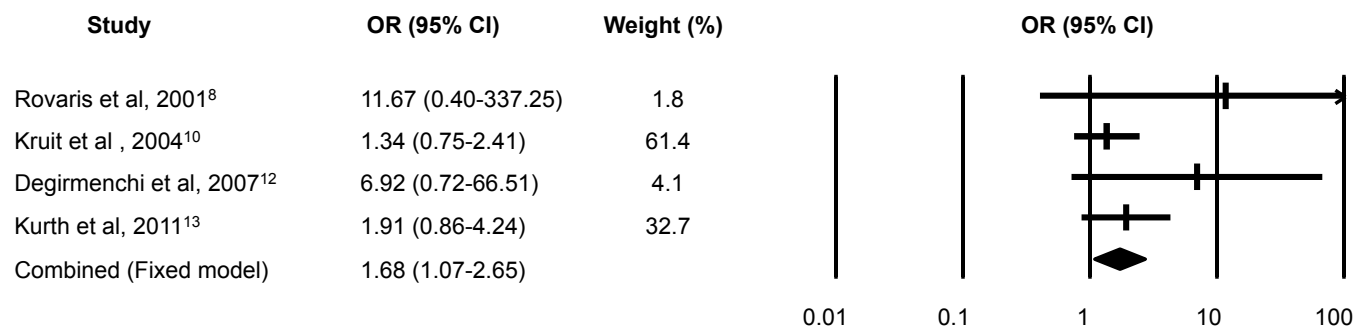

Heterogeneity:  $Q = 3.44$ ,  $df = 3$ , ( $p = 0.33$ );  $I^2 = 12.89$ .  
 Begg and Mazumdar rank correlation analysis:  $p = 0.17$

**Figure e-1b** Meta-analysis and Forest plot of comparison – Patients with MO vs. controls: white matter abnormalities.

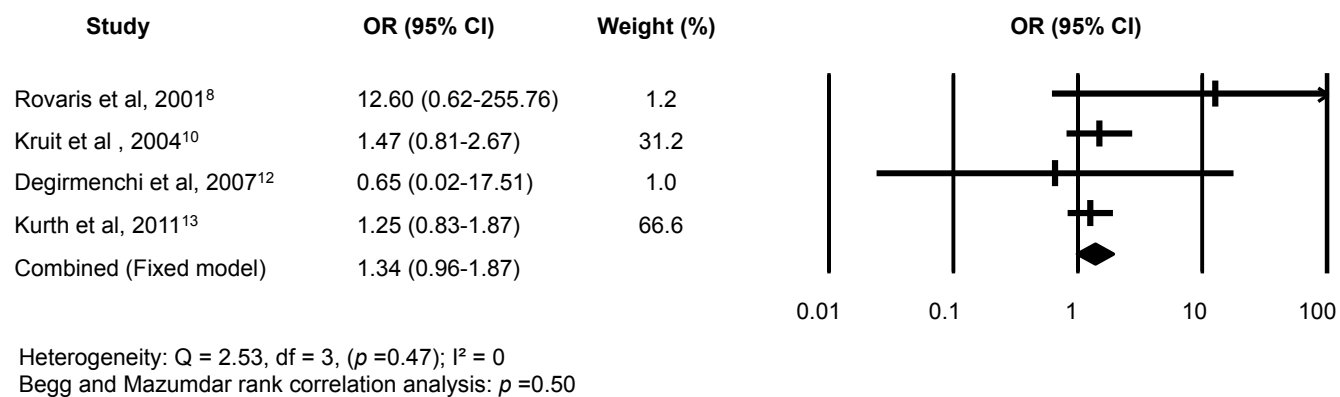

**Figure e-1c** Meta-analysis and Forest plot of comparison – Patients with MA vs. MO: white matter abnormalities.

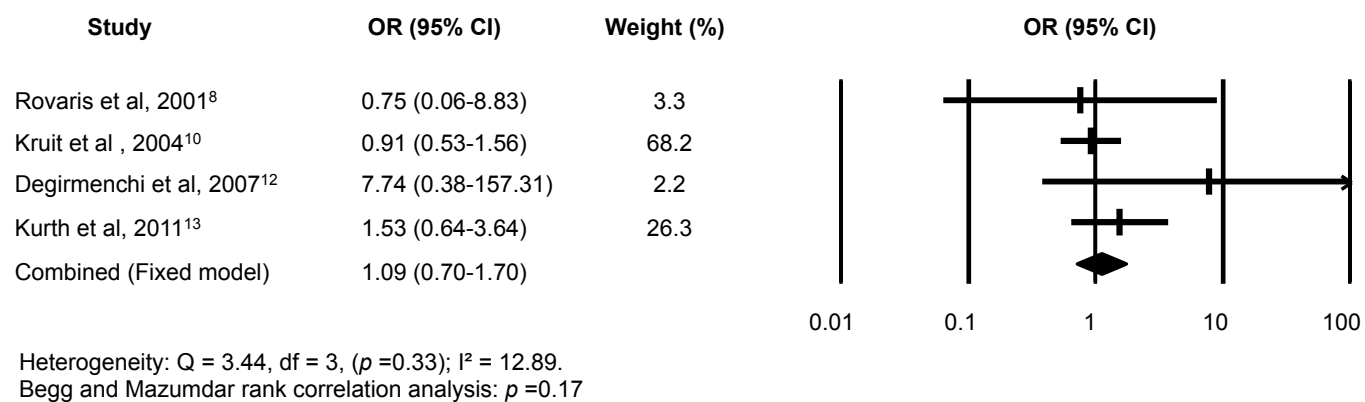

## Figure e-2

**Figure e-2a** Meta-analysis and Forest plot of comparison – Patients with MA vs. controls: silent infarct-like lesions.

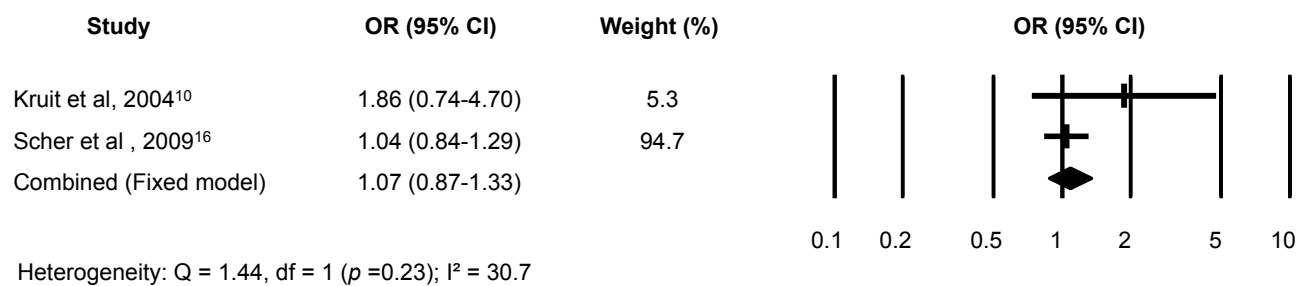

**Figure e-2b** Meta-analysis and Forest plot of comparison – Patients with MO vs. controls: silent infarct-like lesions.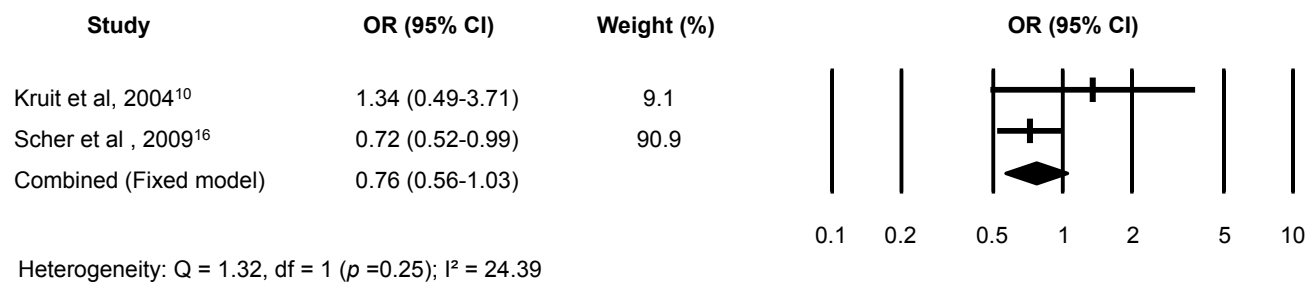

**Figure e-2c** Meta-analysis and Forest plot of comparison – Patients with MA vs. MO: silent infarct-like lesions.

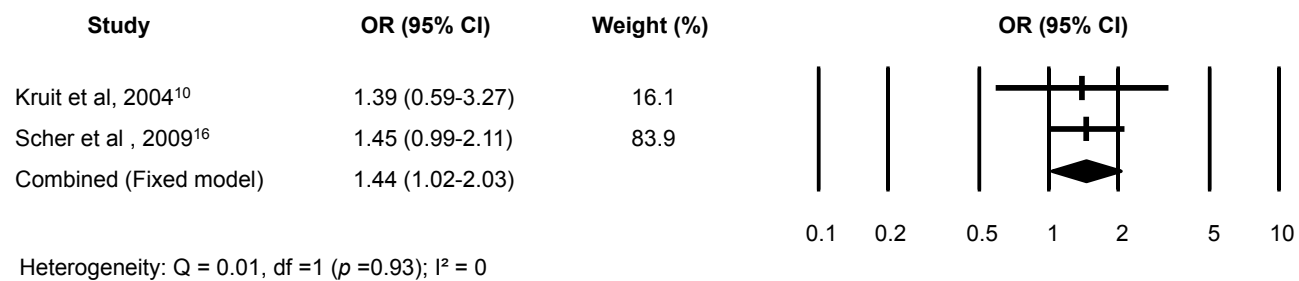

Supplement: supp_WNL.0b013e3182a6cb32_Figures.pdf [file supp_WNL.0b013e3182a6cb32_Figures.pdf]
